# Supplementary material for: Eggshell/Fe3O4nanocomposite: novel magnetic nanoparticles coated on porous ceramic eggshell waste as an efficient catalyst in the synthesis of 1,8-dioxo-octahydroxanthene
Source: Royal Society of Chemistry journal article supplement (doi:10.1039/c5ra17639e), 2015-01-01

## Supplementary Information

### Selected spectral data of four representative 1,8-dioxo-1,2,3,4,5,6,7,8-octahydroxanthenes:

#### **3,3,6,6-Tetramethyl-9-(4-chlorophenyl)-1,8-dioxo-1,2,3,4,5,6,7,8-octahydro-xanthene** (Table 2, entry 2):

IR (KBr) $\nu_{\text{max}}$ : 3080, 2982, 1691, 1666, 1640, 1617, 1492, 1368, 1195, 1145, 1120, 1095, 1021, 847  $\text{cm}^{-1}$ .  $^1\text{H}$  NMR ( $\text{CDCl}_3$ , 500 MHz)  $\delta$ : 0.88 (s, 6H, 2 $\text{CH}_3$ ), 1.01 (s, 6H, 2 $\text{CH}_3$ ), 2.19 (dd, 4H,  $J=16.4, 16.1\text{MHz}$ , 2 $\text{CH}_2$ ), 2.51 (dd, 4H,  $J=15.2, 12.0\text{MHz}$ , 2 $\text{CH}_2$ ), 4.72 (s, 1H), 7.52-8.10 (m, 4H, ArH);  $^{13}\text{C}$  NMR ( $\text{CDCl}_3$ , 125.77 MHz)  $\delta$ : 26.4, 28.5, 30.8, 31.7, 49.9, 113.9, 127.7, 129.8, 130.6, 143.1, 162.9, 195.9.

#### **3,3,6,6-Tetramethyl-9-(2,4-dichlorophenyl)-1,8-dioxo-1,2,3,4,5,6,7,8-octahydroxanthene** (Table 2, entry 4):

IR (KBr)  $\nu$ : 3081, 2982, 1691, 1617, 1592, 1567, 1492, 1368, 1195, 1170, 1120, 1095, 1070, 1021, 872, 847, 773, 574  $\text{cm}^{-1}$ ;  $^1\text{H}$  NMR ( $\text{CDCl}_3$ , 500 MHz)  $\delta$ : 0.90 (s, 6H, 2 $\text{CH}_3$ ), 1.02 (s, 6H, 2 $\text{CH}_3$ ), 2.13 (dd, 4H,  $J=16.0, 16.1\text{MHz}$ , 2 $\text{CH}_2$ ), 2.51 (t, 4H, 2 $\text{CH}_2$ ), 4.78 (s, 1H), 7.23-7.38 (m, 4H, ArH);  $^{13}\text{C}$  NMR ( $\text{CDCl}_3$ , 125.77 MHz)  $\delta$ : 26.4, 28.5, 30.1, 31.6, 49.9, 112.7, 126.6, 128.6, 131.3, 133.0, 133.7, 139.9, 163.2, 195.7.

#### **3,3,6,6-Tetramethyl-9-(3-nitrophenyl)-1,8-dioxo-1,2,3,4,5,6,7,8-octahydroxanthene** (Table 2, entry 3):

IR (KBr)  $\nu$ : 3080, 2957, 2907, 1667, 1641, 1542, 1368, 1219, 1170, 1145, 1021, 822, 748, 698  $\text{cm}^{-1}$ ;  $^1\text{H}$  NMR ( $\text{CDCl}_3$ , 500 MHz)  $\delta$ : 0.89 (s, 6H, 2 $\text{CH}_3$ ), 1.02 (s, 6H, 2 $\text{CH}_3$ ), 2.17 (dd, 4H,  $J=16.1, 16.2\text{MHz}$ , 2 $\text{CH}_2$ ), 2.56 (s, 4H, 2 $\text{CH}_2$ ), 4.63 (s, 1H), 7.52-7.99 (m, 4H, ArH);  $^{13}\text{C}$  NMR ( $\text{CDCl}_3$ , 125.77 MHz)  $\delta$ : 26.4, 28.4, 31.5, 31.8, 49.8, 113.3, 121.3, 122.5, 129.4, 134.7, 146.3, 147.3, 163.4, 196.0.

#### **3,3,6,6-Tetramethyl-9-(4-nitrophenyl)-1,8-dioxo-1,2,3,4,5,6,7,8-octahydroxanthene** (Table 2, entry 9):

IR (KBr)  $\nu$ : 3081, 2957, 1666, 1641, 1542, 1492, 1368, 1219, 1170, 1145, 1121, 822, 748  $\text{cm}^{-1}$ ;  $^1\text{H}$  NMR ( $\text{CDCl}_3$ , 500 MHz)  $\delta$ : 0.96 (s, 6H, 2 $\text{CH}_3$ ), 1.09 (s, 6H, 2 $\text{CH}_3$ ), 2.15 (dd, 4H,  $J=15.8, 15.9\text{MHz}$ , 2 $\text{CH}_2$ ), 2.59 (s, 4H, 2 $\text{CH}_2$ ), 4.48 (s, 1H), 7.16-7.26 (m, 4H, ArH);  $^{13}\text{C}$  NMR ( $\text{CDCl}_3$ , 125.77 MHz)  $\delta$ : 26.4, 27.0, 29.0, 32.3, 50.3, 113.8, 123.6, 129.9, 146.4, 152.2, 163.9, 196.5.

## EDX analysis of the nanocomposite

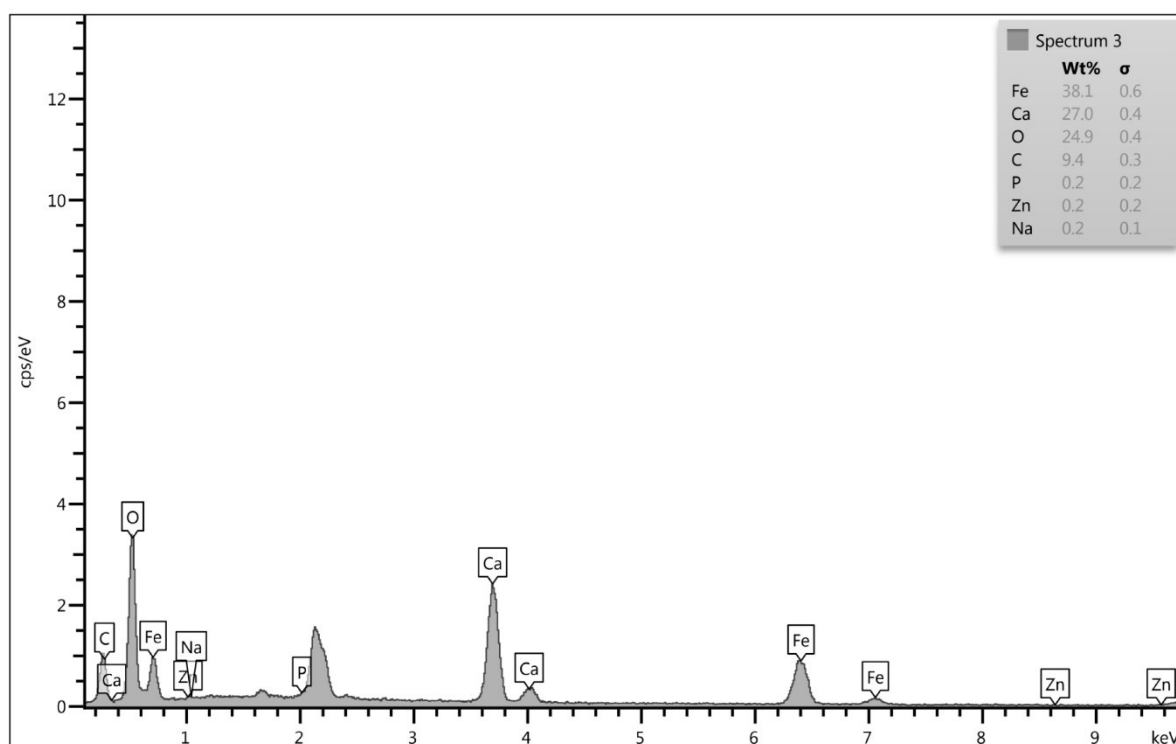

Supplement: c5ra17639e1.pdf [file c5ra17639e1.pdf]
